# Supplementary material for: Allelic Imbalances in Radiation—Associated Acute Myeloid Leukemia
Source: PubMed Central journal article supplement (PMC3424488; doi:10.3390/genes2020384), 2011-05-31
Supplement: NIHMS394894-supplement-patient_clinical_data.pdf [file NIHMS394894-supplement-patient_clinical_data.pdf]

**Table 2.** Anamnestic, clinical, cytogenetic and molecular genetic information of radiation-associated AML patients.

| Case | Group | Sex/Age, Years <sup>a</sup> | Occupation      | Preceded by MDS | FAB Type | Latency Time, Years <sup>b</sup> | Karyotype    | AML1/ETO by FISH or RT-PCR | MLL translocation |                |          | FLT3 ITD | FLT3 D835 |
|------|-------|-----------------------------|-----------------|-----------------|----------|----------------------------------|--------------|----------------------------|-------------------|----------------|----------|----------|-----------|
|      |       |                             |                 |                 |          |                                  |              |                            | FISH Results      | RT-PCR results |          |          |           |
|      |       |                             |                 |                 |          |                                  |              |                            |                   | MLL/AF9        | MLL/AF4  |          |           |
| 1    | CW    | M/60                        | engineer        | Yes             | M0       | 16                               | ND           | negative                   | negative          | ND             | ND       | WT       | WT        |
| 2    | CW    | M/73                        | economist       | Yes             | M2       | 17                               | ND           | ND                         | ND                | negative       | negative | WT       | WT        |
| 3    | CW    | M/42                        | driver          | Yes             | M6       | 17                               | ND           | negative                   | ND                | ND             | negative | WT       | WT        |
| 4    | CW    | M/42                        | welder          | Yes             | M6       | 9                                | ND           | ND                         | ND                | ND             | ND       | WT       | WT        |
| 5    | CW    | M/67                        | sailor          | No              | M0       | 18                               | ND           | ND                         | ND                | ND             | ND       | WT       | WT        |
| 6    | CW    | M/59                        | agronomist      | No              | M1       | 16                               | ND           | negative                   | negative          | negative       | negative | WT       | WT        |
| 7    | CW    | M/55                        | farmer          | No              | M2       | 18                               | 47,XY,+8[12] | negative                   | negative          | ND             | ND       | WT       | WT        |
| 8    | CW    | M/66                        | policeman       | No              | M2       | 16                               | ND           | negative                   | negative          | ND             | negative | Mut      | WT        |
| 9    | CW    | M/76                        | ND <sup>c</sup> | No              | M2       | 15                               | ND           | negative                   | negative          | ND             | ND       | WT       | WT        |
| 10   | CW    | M/59                        | security guard  | No              | M4       | 11                               | ND           | negative                   | negative          | ND             | ND       | WT       | WT        |
| 11   | CW    | M/62                        | serviceman      | No              | M4       | 16                               | 46,XY [15]   | negative                   | negative          | negative       | ND       | WT       | WT        |
| 12   | CW    | M/35                        | driver          | No              | M5a      | 11                               | ND           | negative                   | negative          | ND             | ND       | Mut      | WT        |
| 13   | CW    | M/43                        | loader          | No              | M5a      | 17                               | 46,XY [15]   | ND                         | negative          | ND             | ND       | Mut      | WT        |
| 14   | V     | M/29                        | mechanic        | Yes             | M4       | 16                               | ND           | negative                   | negative          | ND             | ND       | WT       | WT        |
| 15   | V     | M/57                        | mechanic        | Yes             | M5a      | 16                               | ND           | negative                   | negative          | ND             | ND       | WT       | WT        |
| 16   | V     | M/71                        | farmer          | No              | M0       | 14                               | ND           | negative                   | negative          | ND             | ND       | WT       | WT        |
| 17   | V     | F/26                        | housewife       | No              | M1       | 17                               | ND           | negative                   | negative          | ND             | ND       | WT       | WT        |
| 18   | V     | M/33                        | tractor driver  | No              | M4       | 12                               | ND           | negative                   | negative          | ND             | ND       | WT       | WT        |
| 19   | V     | M/42                        | crane-operator  | No              | M5b      | 15                               | ND           | negative                   | negative          | ND             | ND       | WT       | WT        |

MDS: myelodysplastic syndrome; FAB: French-American-British; FISH: fluorescence *in situ* hybridization; RT-PCR: reverse transcription polymerase chain reaction; FLT3 ITD: internal tandem duplications of FLT3 gene status by PCR; FLT3 D835: FLT3 D835 mutation status by PCR; CW: clean-up worker of the Chernobyl accident; V: victim, indicates patient evacuated from the Chernobyl exclusion zone or domiciled in highly contaminated with radioactive fallout rural areas of the Ukraine; M: male; F: female ND: no data; WT: wild type; Mut: mutated; <sup>a</sup>: at time of diagnosis; <sup>b</sup>: time since first exposure due to the Chernobyl accident to overt AML; <sup>c</sup>: retired at the time of diagnosis.
